# Supplementary material
Source: ML conference proceedings conference paper supplement (https://proceedings.neurips.cc/paper_files/paper/2021/hash/2bd388f731f26312bfc0fe30da009595-Abstract.html)
Supplement: Supplementary file 1 [file 2bd388f731f26312bfc0fe30da009595-Supplemental.pdf]

## A Derivation of time-evolving attention operators

We show the full derivation of Equation 6 as follows. Let  $\mathbf{X}' = \{X'_i | X'_i \in \mathbb{R}^{d+d'}\}_{i=1}^n$  be a sequence of vectors (which is the original  $d$ -dimensional input augmented with  $d'$ -dimensional depth information). Let us further assume  $X'_i = \{x'_{ij} | x'_{ij} \in \mathbb{R}\}_{j=1}^{d+d'}$ . For two projection matrices  $W'_q, W'_k \in \mathbb{R}^{d \times (d+d')}$  where  $W'_q = [\omega_{ij}]_{i,j=1}^{d+d', d+d'}$  and  $W'_k = [\theta_{ij}]_{i,j=1}^{d+d', d+d'}$ , the query and key projections become:

$$Q_i = X'_i W'_q = \{q_{ij} | q_{ij} = \sum_{l=1}^{d+d'} x'_{il} \omega_{lj}\}_{j=1}^{d+d'}$$

$$K_i = X'_i W'_k = \{k_{ij} | k_{ij} = \sum_{l=1}^{d+d'} x'_{il} \theta_{lj}\}_{j=1}^{d+d'}$$

Then, the pre-softmax dot-product attention matrix for  $\mathbf{X}'$  becomes  $\mathbf{A}' = [a'_{ij}]_{i,j=1}^{n,n}$  where

$$\begin{aligned} a'_{ij} &= Q_i K_j = \sum_{\alpha=1}^{d+d'} (q_{i\alpha} k_{j\alpha}) \\ &= \sum_{\alpha=1}^{d+d'} \left( \sum_{\beta=1}^{d+d'} x'_{i\beta} \omega_{\beta\alpha} \sum_{\beta=1}^{d+d'} x'_{j\beta} \theta_{\beta\alpha} \right) \\ &= \sum_{\alpha=1}^{d+d'} \left( \left( \sum_{\beta=1}^d x'_{i\beta} \omega_{\beta\alpha} + \sum_{\beta=d+1}^{d+d'} x'_{i\beta} \omega_{\beta\alpha} \right) \left( \sum_{\beta=1}^d x'_{j\beta} \theta_{\beta\alpha} + \sum_{\beta=d+1}^{d+d'} x'_{j\beta} \theta_{\beta\alpha} \right) \right) \\ &= \sum_{\alpha=1}^{d+d'} \left( \sum_{\beta=1}^d x'_{i\beta} \omega_{\beta\alpha} \sum_{\beta=1}^d x'_{j\beta} \theta_{\beta\alpha} + \sum_{\beta=d+1}^{d+d'} x'_{i\beta} \omega_{\beta\alpha} \sum_{\beta=1}^d x'_{j\beta} \theta_{\beta\alpha} \right. \\ &\quad \left. + \sum_{\beta=1}^d x'_{i\beta} \omega_{\beta\alpha} \sum_{\beta=d+1}^{d+d'} x'_{j\beta} \theta_{\beta\alpha} + \sum_{\beta=d+1}^{d+d'} x'_{i\beta} \omega_{\beta\alpha} \sum_{\beta=d+1}^{d+d'} x'_{j\beta} \theta_{\beta\alpha} \right) \\ &= \sum_{\alpha=1}^{d+d'} \left( \sum_{\beta=1}^d x'_{i\beta} \omega_{\beta\alpha} \sum_{\beta=1}^d x'_{j\beta} \theta_{\beta\alpha} \right) + \sum_{\alpha=1}^{d+d'} \left( \sum_{\beta=d+1}^{d+d'} x'_{i\beta} \omega_{\beta\alpha} \sum_{\beta=1}^d x'_{j\beta} \theta_{\beta\alpha} \right) \\ &\quad + \sum_{\alpha=1}^{d+d'} \left( \sum_{\beta=1}^d x'_{i\beta} \omega_{\beta\alpha} \sum_{\beta=d+1}^{d+d'} x'_{j\beta} \theta_{\beta\alpha} \right) + \sum_{\alpha=1}^{d+d'} \left( \sum_{\beta=d+1}^{d+d'} x'_{i\beta} \omega_{\beta\alpha} \sum_{\beta=d+1}^{d+d'} x'_{j\beta} \theta_{\beta\alpha} \right) \end{aligned}$$

Recall that  $X'_i$  is the concatenation of  $X_i$  and  $T^l$ . That means, for  $1 \leq \beta \leq d$ ,  $x'_{i\beta} \in X_i = \{x_{i\gamma}\}_{\gamma=1}^d$  and for  $d+1 \leq \beta \leq d+d'$ ,  $x'_{i\beta} \in T^l = \{\tau_\gamma(l)\}_{\gamma=1}^{d'}$ . Furthermore, we decompose  $W'_q$  as concatenation of two matrices  $W_q, \tilde{W}_q$  such that  $W_q = [\omega_{ij}]_{i,j=1,1}^{d, d+d'}$  and  $\tilde{W}_q = [\omega_{ij}]_{i,j=d+1,1}^{d+d', d+d'}$ . Similarly, we decompose  $W'_k$  into  $W_k$  and  $\tilde{W}_k$ . Then the previous expression for  $a'_{ij}$  can be re-written as:

$$\begin{aligned} a'_{ij} &= \sum_{\alpha=1}^{d+d'} \left( \sum_{\gamma=1}^d x_{i\gamma} \omega_{\gamma\alpha} \sum_{\gamma=1}^d x_{j\gamma} \theta_{\gamma\alpha} \right) + \sum_{\alpha=1}^{d+d'} \left( \sum_{\gamma=1}^{d'} \tau_\gamma(l) \omega_{\gamma+d,\alpha} \sum_{\gamma=1}^d x_{j\gamma} \theta_{\gamma\alpha} \right) \\ &\quad + \sum_{\alpha=1}^{d+d'} \left( \sum_{\gamma=1}^d x_{i\gamma} \omega_{\gamma\alpha} \sum_{\gamma=1}^{d'} \tau_\gamma(l) \theta_{\gamma+d,\alpha} \right) + \sum_{\alpha=1}^{d+d'} \left( \sum_{\gamma=d+1}^{d+d'} \tau_\gamma(l) \omega_{\gamma+d,\alpha} \sum_{\gamma=d+1}^{d+d'} \tau_\gamma(l) \theta_{\gamma+d,\alpha} \right) \\ &= (X_i W_q)(X_j W_k)^\top + (X_i W_q)(T^l \tilde{W}_k)^\top + (T^l \tilde{W}_q)(X_j W_k)^\top + (\tilde{W}_q \tilde{W}_k)(T^l \odot T^l) \\ &= a_{ij} + A_{1i} T^{l\top} + T^l A_{2j} + A_3 (T^l \odot T^l) \end{aligned}$$

where  $A_{1i}$ ,  $A_{2j}$ , and  $A_3$  are  $d'$  dimensional vectors corresponding the given input vector  $X_i$ . For input vector sequence  $\mathbf{X}_i$ , these form the time-evolution operators of attention,  $\mathbf{A}_1, \mathbf{A}_2, \mathbf{A}_3$ .

## B Properties of random sine-cosine matrices

In Section 5, we redesigned a single feed-forward operation at depth  $l$  on a given input  $X_i \in \mathbb{R}^d$  to produce output  $X_{i+1} \in \mathbb{R}^{d'}$  as  $X_{i+1} = \sigma(U^l \Sigma V^l X_i + B)$  where  $U^l \in \mathbb{R}^{d \times d}$ ,  $V^l \in \mathbb{R}^{d' \times d'}$  are random sine-cosine matrices to approximate rotation,  $\Sigma \in \mathbb{R}^{d \times d'}$  is a rectangular diagonal matrix with learnable entries  $\{\lambda_j\}_{j=1}^{\min(d,d')}$ ,  $B \in \mathbb{R}^{d'}$  is a learnable bias, and  $\sigma(\cdot)$  is a non-linearity (ReLU in our case).  $U^l$  ( $V^l$ ) is defined as

$$U^l = \frac{1}{\sqrt{d}} \begin{bmatrix} \sin(w_{11}^l \frac{l}{P}) & \dots & \sin(w_{1\frac{d}{2}}^l \frac{dl}{2P}) & \cos(w_{11}^l \frac{l}{P}) & \dots & \cos(w_{1\frac{d}{2}}^l \frac{dl}{2P}) \\ \vdots & & & & & \vdots \\ \sin(w_{d1}^l \frac{l}{P}) & \dots & \sin(w_{d\frac{d}{2}}^l \frac{dl}{2P}) & \cos(w_{d1}^l \frac{l}{P}) & \dots & \cos(w_{d\frac{d}{2}}^l \frac{dl}{2P}) \end{bmatrix}$$

where  $w_{ij}^l \in \mathcal{N}(0, \sigma^2)$  and  $P = \frac{dL}{2\pi}$ .

Let  $A = U^l (U^l)^\top = [\alpha_{ij}]_{i,j=1,1}^{d,d}$ . Then for all  $1 \leq i \leq d$ ,

$$\alpha_{ii} = \sum_{j=1}^{\frac{d}{2}} \frac{1}{d} \left( \sin^2(w_{ij} \frac{jl}{P}) + \cos^2(w_{ij} \frac{jl}{P}) \right) = \frac{1}{2}$$

For all  $i \neq j$ ,

$$\begin{aligned} \alpha_{ij} &= \frac{1}{d} \sum_{k=1}^{\frac{d}{2}} \left( \sin(w_{ik} \frac{kl}{P}) \sin(w_{jk} \frac{kl}{P}) + \cos(w_{ik} \frac{kl}{P}) \cos(w_{jk} \frac{kl}{P}) \right) \\ &= \frac{1}{d} \sum_{k=1}^{\frac{d}{2}} (A_k + B_k) \end{aligned}$$

where  $A_k = \sin(w_{ik} \frac{kl}{P}) \sin(w_{jk} \frac{kl}{P})$  and  $B_k = \cos(w_{ik} \frac{kl}{P}) \cos(w_{jk} \frac{kl}{P})$ . Let  $\frac{kl}{P} = \kappa$ ; then we can rewrite  $A_k$  and  $B_k$  as:

$$\begin{aligned} A_k &= \left( \frac{\exp(\mathbf{i}w_{ik}\kappa) - \exp(-\mathbf{i}w_{ik}\kappa)}{2\mathbf{i}} \right) \left( \frac{\exp(\mathbf{i}w_{jk}\kappa) - \exp(-\mathbf{i}w_{jk}\kappa)}{2\mathbf{i}} \right) \\ &= \frac{-1}{4} (\exp(\mathbf{i}w_{ik}\kappa + \mathbf{i}w_{jk}\kappa) + \exp(-\mathbf{i}w_{ik}\kappa - \mathbf{i}w_{jk}\kappa) \\ &\quad - \exp(\mathbf{i}w_{ik}\kappa - \mathbf{i}w_{jk}\kappa) - \exp(-\mathbf{i}w_{ik}\kappa + \mathbf{i}w_{jk}\kappa)) \\ B_k &= \left( \frac{\exp(\mathbf{i}w_{ik}\kappa) + \exp(-\mathbf{i}w_{ik}\kappa)}{2} \right) \left( \frac{\exp(\mathbf{i}w_{jk}\kappa) + \exp(-\mathbf{i}w_{jk}\kappa)}{2} \right) \\ &= \frac{1}{4} (\exp(\mathbf{i}w_{ik}\kappa + \mathbf{i}w_{jk}\kappa) + \exp(-\mathbf{i}w_{ik}\kappa - \mathbf{i}w_{jk}\kappa) \\ &\quad + \exp(\mathbf{i}w_{ik}\kappa - \mathbf{i}w_{jk}\kappa) + \exp(-\mathbf{i}w_{ik}\kappa + \mathbf{i}w_{jk}\kappa)) \end{aligned}$$

Assuming  $w_{ik} \in X$  and  $w_{jk} \in Y$  where  $X$  and  $Y$  are two independent random variables with pdf defined as  $f(X) = \frac{1}{\sigma\sqrt{2\pi}} \exp(-\frac{X^2}{2\sigma^2})$  and  $f(Y) = \frac{1}{\sigma\sqrt{2\pi}} \exp(-\frac{Y^2}{2\sigma^2})$ ,

$$\begin{aligned} \mathbb{E}[\exp(\mathbf{i}w_{ik}\kappa + \mathbf{i}w_{jk}\kappa)] &= \frac{1}{2\pi\sigma^2} \int_{-\infty}^{\infty} \int_{-\infty}^{\infty} \exp(\mathbf{i}X\kappa + \mathbf{i}Y\kappa) \exp(-\frac{X^2}{2\sigma^2}) \exp(-\frac{Y^2}{2\sigma^2}) dX dY \\ &= \exp(-\frac{\sigma^2}{2}\kappa) \\ &= \mathbb{E}[\exp(\mathbf{i}w_{ik}\kappa - \mathbf{i}w_{jk}\kappa)] = \mathbb{E}[\exp(-\mathbf{i}w_{ik}\kappa - \mathbf{i}w_{jk}\kappa)] \end{aligned}$$

Then

$$\mathbb{E}[A_k] = \frac{-1}{4} \left( 2 \exp(-\frac{\sigma^2}{2}\kappa) - 2 \exp(-\frac{\sigma^2}{2}\kappa) \right) = 0$$

and similarly,

$$\mathbb{E}[B_k] = \frac{1}{4} \left( 2 \exp(-\frac{\sigma^2}{2}\kappa) + 2 \exp(-\frac{\sigma^2}{2}\kappa) \right) = \exp(-\frac{\sigma^2}{2}\kappa)$$

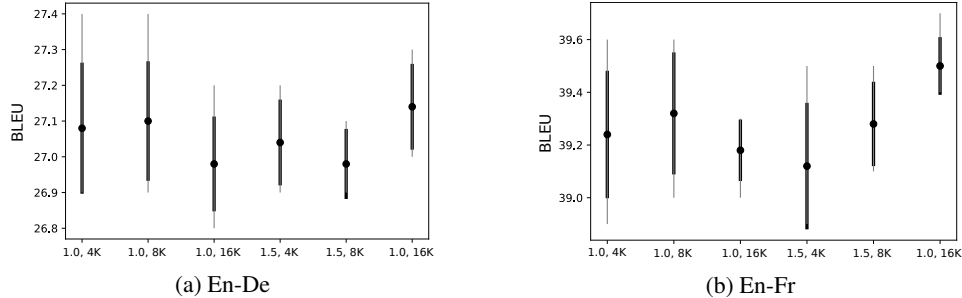

Figure 2: Variation of BLEU score for En-De (WMT 2014) and En-Fr (WMT 2014) translation with different learning rates and warmup steps. x-axis in both plots show the  $(lr_{max}, warmup\_step)$  pairs. The model variation used here in **TransEvolve-fullFF**.

Therefore,  $\mathbb{E}[\alpha_{ij}] = \frac{1}{d} \sum_{k=1}^{\frac{d}{2}} \exp(-\frac{\sigma^2}{2} \frac{kl}{P})$  which approaches 0 as  $\sigma$  gets larger. Thus, on the limiting case, we get  $\mathbb{E}[U^l(U^l)^\top] = \frac{1}{2}\mathbf{I}_d$  where  $\mathbf{I}_d$  is the  $d$ -dimensional identity matrix. This way,  $U^l$  approximates a rotation matrix as we choose  $\sigma = \mathcal{O}(d)$ .

## C Task related details

Here we describe the experimental details for encoder-decoder and encoder-only tasks. **TransEvolve** is implemented using Tensorflow version 2.4.1.

**Machine translation.** For both En-De and En-Fr tasks, we use a batch size of 512 with maximum allowed input sentence length of 256 while training and train for a total of 300,000 steps. Time needed for training varies with model configurations: **TransEvolve-randomFF-1** takes 18 hours to finish while **TransEvolve-fullFF-2** takes around 32 hours. All of these training and testings are done with 32-bit floating point precision. To find the optimal learning rate, we used the following pairs of  $(lr_{max}, warmup\_step)$  values (see Section 7.3): (1.0, 4000), (1.0, 8000), (1.0, 16000), (1.5, 4000), (1.5, 8000), and, (1.5, 16000). For all the experiments, the optimizer we use is Adam with  $\beta_1 = 0.9$ ,  $\beta_2 = 0.98$ , and  $\epsilon = 10^{-9}$ . We used beam search with beam size 4 and length penalty 0.6. For En-De task, we used an extra decode length of 50; for En-Fr, this value is set to 35. Figure 2 summarizes the variation in performance with different  $(lr_{max}, warmup\_step)$  values; we run 5 independent training and testing with different random seeds, and choose the maximum BLEU score from each runs to plot this variation.

**Encoder-only tasks.** As mentioned in Section 7.1, we experiment with the small version of **TransEvolve** variants ( $d = 256$ ) for all the encoder-only tasks. We set the values of  $(lr_{max}, warmup\_step)$  to (0.5, 8000) and use the default parameters of Adam to optimize. All encoder-only experiments are done using a maximum input length of 512.

In the text classification regime, we use the BERT (base uncased) tokenizer from Huggingface<sup>1</sup>. The batch size is set to 80. We train each model for 15 epochs. However, the best models emerge by 7-8 epochs of training with a  $\pm 0.2\%$  error range in test accuracy over 5 randomly initialized runs.

In the long range sequence classification regime, the tokenization (character-level in IMDB and operation symbols in ListOps) and maximum input lengths are predefined. We use a batch size of 48 for the IMDB dataset, and 64 for the ListOps dataset. Again, we train all the models for 15 epochs, with best performances emerging after 9-10 epochs of training with error margins  $\pm 0.8\%$  in ListOps and  $\pm 0.3$  in IMDB datasets.

<sup>1</sup>[https://huggingface.co/transformers/model\\_doc/bert.html#berttokenizer](https://huggingface.co/transformers/model_doc/bert.html#berttokenizer)
